# Supplementary material
Source: PubMed Central journal article supplement (PMC1399371)

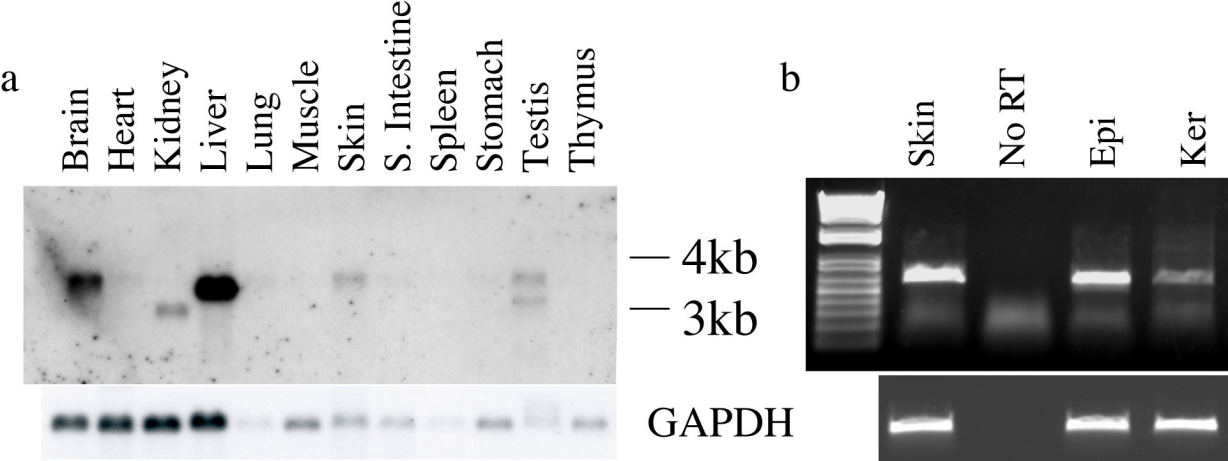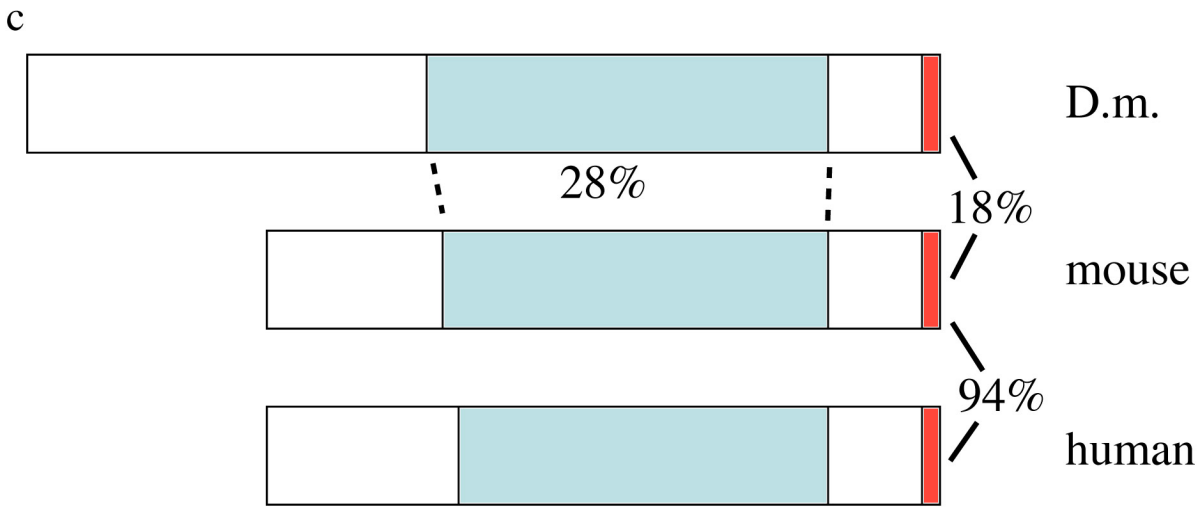

Supplement: NIHMS5344-supplement-SFig1.pdf [file NIHMS5344-supplement-SFig1.pdf]

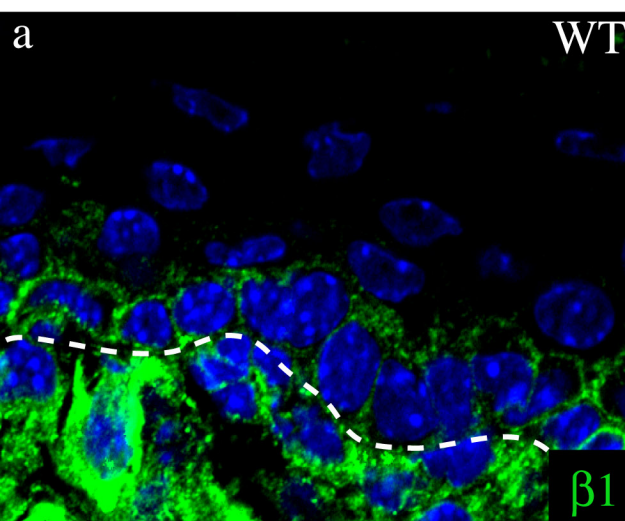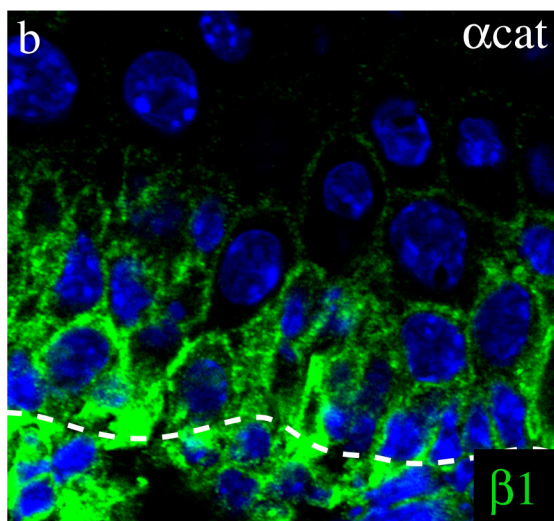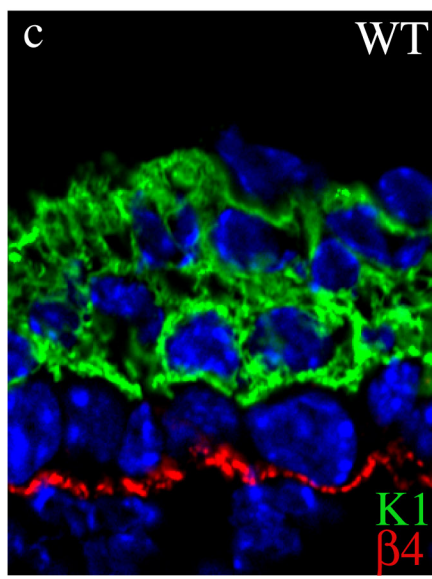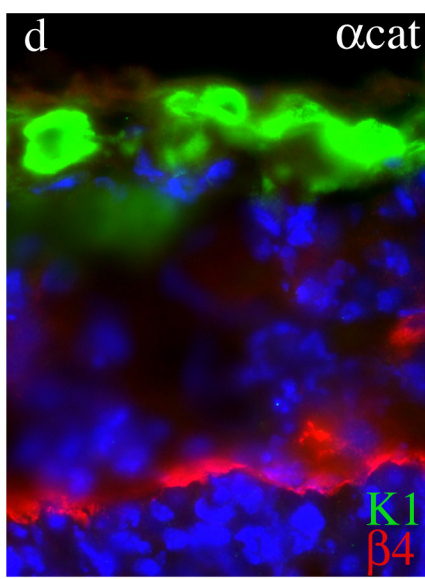

Supplement: NIHMS5344-supplement-SFig2.pdf [file NIHMS5344-supplement-SFig2.pdf]
